# Supplementary material for: Dynamic Nucleosome Movement Provides Structural Information of Topological Chromatin Domains in Living Human Cells
Source: PubMed Central journal article supplement (PMC5072619; doi:10.1371/journal.pcbi.1005136), 2016-10-20
Supplement: pcbi.1005136.s005.pdf [file pcbi.1005136.s005.pdf]

**S1 Table.** The number of tracked trajectories  $M_i$  and the standard error of the mean (SEM) of the MSD at the nuclear interior region and the periphery region. The measurements at each region were performed using 10 cells.

| $t_i$ (ms) | Interior |                     | Periphery |                     |
|------------|----------|---------------------|-----------|---------------------|
|            | $M_i$    | SEM of MSD( $t_i$ ) | $M_i$     | SEM of MSD( $t_i$ ) |
| 50         | 47797    | 0.0000246           | 35289     | 0.0000264           |
| 100        | 47732    | 0.0000361           | 35267     | 0.0000367           |
| 150        | 47498    | 0.0000424           | 35176     | 0.0000418           |
| 200        | 36291    | 0.0000550           | 26072     | 0.0000556           |
| 250        | 27876    | 0.0000683           | 19614     | 0.0000686           |
| 300        | 21625    | 0.0000817           | 14572     | 0.0000839           |
| 350        | 17074    | 0.0000957           | 11008     | 0.0001017           |
| 400        | 13650    | 0.0001093           | 8533      | 0.0001190           |
| 450        | 11047    | 0.0001240           | 6825      | 0.0001331           |
| 500        | 9047     | 0.0001371           | 5491      | 0.0001510           |
